# Supplementary material
Source: publisher figshare collection journal article supplement (https://acs.figshare.com/ndownloader/files/10325505)
Supplement: Supplementary file 1 [file 10325505]

## Sheet: Supplementary Table 1
Supplementary Table 1. List of crystal structures of Abl-ligand complexes used in this study
																									active	inactive
PDB ID	Construct	Ligand	ATP site inhibitor type	No of chains	Chain	Space group	Resolution	D400 phi (deg)	D400 psi (deg)	DFG	d(K375CA-G409CA) (Å)	A-loop	αC-helix	Organism	Mutation	Chain Length	resno_offset_add	Avg B-factor CA (400-422)	Std B-factor CA (400-422)	N CA (400-422)	missing CA (400-422)				C 1 2 1	C 2 2 21
1M52	KD	PD173955	I	2	A	P 21 21 2	2.6	-89.4	-13.8	flip	14.1	active	Glu in	Mouse	None	293	19	48.39	13.94	22	0				C 2 2 21	C 1 2 1
1OPK	SH3-SH2-KD	PD166326+Myristic acid	I	1	A	C 2 2 21	1.8	-116	33.5	flip	10.6	active	Glu in	Mouse	D382N	495	0	42.54	10.32	22	0				P 1 21 1	F 2 2 2
1OPL	SH3-SH2-KD	PD166326+Myristic acid	I	2	A	C 2 2 21	3.4	-116	33.3	flip	10.6	active	Glu in	Human	K29R, E30D, D382N	537	0	111.66	28.22	22	0				P 2 21 21	I 41 2 2
2FO0	SH3-SH2-KD	PD166326+Myristic acid	I	1	A	P 21 21 2	2.3	-95.5	43.1	flip	11.4	active	Glu in	Human	S69X, D382N	495	0	56.52	14.85	22	0				P 21 21 2	P 1
2G2F	KD	112	I	2	A	P 21 21 2	2.7	-87.4	-14.5	flip	10.3	active	Glu out	Human	H415P	287	19	46.12	5.39	22	0				P 32 2 1	P 1 21 1
2G2H	KD	PD166326	I	2	A	P 21 21 2	2	-117.1	21.7	flip	16.9	active	Glu out	Human	H415P	287	19	22.4	9.8	22	0				P 41 21 2	P 21 21 21
2HZI	KD	PD180970	I	2	A	P 21 21 2	1.7	-117.5	21.9	flip	10.8	active	Glu in	Human	None	277	19	23.71	4.92	22	0				P 43 21 2	P 41
3DK3	KD	SX7	I	2	A	P 21 21 2	2	-136.1	20.3	flip	10.9	active	Glu in	Mouse	Y412F, L464P	293	19	22.82	6.39	22	0				P 62
3DK6	KD	SX7	I	2	A	P 21 21 2	2	-127.5	27.3	flip	10.9	active	Glu in	Mouse	Y272F, L464P	293	19	27.76	4.59	21	412				P 65
3DK7	KD	SX7	I	2	A	P 21 21 2	2	-136.4	26.4	flip	10.9	active	Glu in	Mouse	T334I, L464P	277	19	22.8	3.97	21	412
3HMI	KD	CDK inhibitor	I	1	A	C 1 2 1	1.6	-137.3	25.3	flip	12.3	active	Glu in	Human	None	292	46	16.13	5.06	22	0
3UE4	KD	Bosutinib	I	2	A	P 2 21 21	2.4	-129.5	18.7	flip	12.9	active	Glu out	Human	None	287	19	41.8	8.43	22	0
4WA9	KD	Axitinib	I	2	A	P 2 21 21	2.2	-77.9	-21.1	flip	13.3	active	missing	Human	None	286	19	40.36	8.87	22	0
4XEY	SH2-KD	Dasatinib	I	2	B	P 21 21 2	2.9	-84.7	7.5	flip	13.5	active	Glu out	Human	None	408	0	46.38	6.16	22	0			B avg	43.6785	42.6282
4YC8	KD	4B7	I	2	A	P 21 21 2	2.9	-122.3	46	flip	13.7	active	Glu out	Human	None	287	19	33.48	8.15	22	0			B std	9.53593	10.3745
4ZOG	KD	Tozasertib	I	2	A	P 21 21 2	2.3	-127.8	25.6	flip	10.6	active	Glu out	Human	None	283	19	38	13.62	22	0
2F4J	KD	Tozasertib	I	1	A	P 1 21 1	1.9	46.9	83.9	in	13.7	active	Glu in	Human	H415P	287	19	29.46	7.41	22	0
2G2I	KD	ADP	I	2	A	P 41 21 2	3.1	80.3	76.2	in	13.8	active	Glu in	Human	H415P	287	19	94.08	21.84	22	0
2GQG	KD	Dasatinib	I	2	A	P 43 21 2	2.4	50.1	80.2	in	12.6	active	Glu in	Human	Y412X	278	19	40.21	12.87	21	412
2HZ4	KD	Staurosporine	I	3	B	C 1 2 1	2.8	62.6	92.3	in	12.6	active	Glu in	Human	None	273	19	55.06	3.56	22	0
2QOH	KD	PPY-A	I	2	A	P 1 21 1	1.9	58.3	89.2	in	13.2	active	Glu in	Mouse	None	288	19	40.01	9.48	22	0
2V7A	KD	Danusertib	I	2	A	P 62	2.5	64	66.7	in	13	active	Glu in	Human	T334I	286	19	26.32	5.1	21	412
2Z60	KD	PPY-A	I	1	A	P 1 21 1	1.9	59.6	81.8	in	13.4	active	Glu in	Mouse	T334I	288	19	37.26	9.93	22	0
3KF4	KD	B90	I	2	A	P 1 21 1	1.9	64.3	74.7	in	13.8	active	Glu in	Mouse	None	288	19	26.13	5	22	0
4TWP	KD	Axitinib	I	2	A	P 2 21 21	2.4	57.4	73.7	in	13.6	active	Glu in	Human	T334I	271	19	54.09	7.77	22	0
4XLI	KD	dasatinib	I	2	A	P 65	2.5	45.2	75.2	in	12.7	active	Glu out	Mouse	None	268	46	53.44	10.2	22	0
2XYN	KD	Tozasertib	I	3	A	P 32 2 1	2.8	61.3	77.5	in	12.8	active	Glu in	Human	None	292	46	82.39	11.63	22	0
1FPU	KD	PRC	II	2	A	F 2 2 2	2.4	-158.1	103.8	out	34.1	inactive	Glu in	Mouse	None	293	19	74.32	16.11	22	0
1IEP	KD	Imatinib	II	2	A	F 2 2 2	2.1	-154	97.6	out	33.4	inactive	Glu in	Mouse	None	293	19	66.56	18.11	22	0
1OPJ	KD	Imatinib+Myristic acid	II	2	A	P 1	1.7	-152.9	98.6	out	34.1	inactive	Glu in	Mouse	None	293	0	45.78	13.57	22	0
2E2B	KD	Bafetinib	II	2	A	F 2 2 2	2.2	-153.8	101.4	out	missing	inactive	Glu in	Human	None	293	19	71.23	28.39	18	407-410
2HIW	KD	7MP	II	2	A	P 41	2.2	-158	107.7	out	34.2	inactive	Glu in	Human	None	287	19	26.68	7.33	22	0
2HYY	KD	Imatinib	II	4	A	C 2 2 21	2.4	-156.9	107.7	out	33.9	inactive	Glu in	Human	None	273	19	50.15	9.2	22	0
2HZN	KD	NVP-AFG210	II	1	A	I 41 2 2	2.7	-155.7	124.4	out	33.2	inactive	Glu in	Mouse	None	293	19	94.23	11.14	22	0
3CS9	KD	Nilotinib	II	4	A	P 21 21 21	2.2	-153.5	95.7	out	34.1	inactive	Glu in	Human	None	277	19	46.46	9.55	22	0
3GVU	KD	Imatinib	II	1	A	C 2 2 21	2.8	-150.6	104	out	33.8	inactive	Glu in	Human	None	292	46	36.82	13.15	15	406-408, 415-418
3IK3	KD	Ponatinib	II	2	A	P 1 21 1	1.9	-153.5	108.7	out	missing	inactive	Glu in	Mouse	T334I	288	0	29.78	7.11	16	405-410
3K5V	KD	Imatinib+GNF-2	II	2	A	P 1	1.7	-148.6	103.1	out	34.3	inactive	Glu in	Mouse	None	293	0	30.8	8.21	22	0
3KFA	KD	B91	II	2	A	P 1 21 1	1.2	-152.6	125.7	out	34.1	inactive	Glu in	Mouse	None	288	19	21.2	5.95	22	0
3MS9	KD	Imatinib+MS9	II	2	A	F 2 2 2	1.8	-146.1	100.9	out	34	inactive	Glu in	Mouse	None	293	19	33.24	8.94	20	407-408
3MSS	KD	Imatinib+MS7	II	4	A	C 1 2 1	1.9	-147.7	104.3	out	33.9	inactive	Glu in	Mouse	None	293	19	33.54	8.94	21	408
3OXZ	KD	Ponatinib	II	1	A	P 1 21 1	2.2	-154.4	127.8	out	missing	inactive	Glu in	Mouse	None	284	19	51.36	10.38	12	405-416
3OY3	KD	XY3	II	2	A	P 1 21 1	1.9	-157.6	129	out	34.2	inactive	Glu in	Mouse	T334I	284	19	34.95	9.66	22	0
3PYY	KD	Imatinib+3YY	II	2	A	P 21 21 21	1.9	-148.8	100.5	out	34.2	inactive	Glu in	Human	None	298	0	45.21	13.11	22	0
3QRI	KD	Rebastinib	II	2	A	P 1 21 1	2.1	-143.7	111.1	out	34	inactive	Glu in	Human	None	277	19	31.45	4.57	22	0
3QRJ	KD	Rebastinib	II	2	A	P 1 21 1	1.8	-140.8	104.1	out	32.9	inactive	Glu in	Human	T334I	277	19	18.19	3.59	22	0
3QRK	KD	DP-987	II	1	A	C 2 2 21	2.3	-147	106.1	out	34	inactive	Glu in	Human	None	277	19	28.61	5.17	22	0
5HU9	KD	CHMFL-074	II	1	A	C 2 2 21	1.5	-141.7	111.2	out	missing	inactive	Glu in	Human	None	277	19	27.91	8.02	17	408-412
5MO4	SH3-SH2-KD	AY7+ Nilotinib	II	1	A	C 2 2 21	2.2	-149.4	98.7	out	missing	inactive	Glu in	Human	T334I, D382N	495	0	39.35	8.04	4	402-419
2G1T	KD	112	I	4	A	P 1 21 1	1.8	49.7	38.8	in	28.1	intermediate	Glu out	Human	None	287	19	29.34	10.2	22	0
2HZ0	KD	GIN	II	2	A	P 21 21 21	2.1	-160.3	120	out	11	intermediate	Glu in	Human	None	270	19	25.09	5.12	22	0

## Sheet: Supplementary Table 2
Supplementary Table 2. List of ligands obtained from commercial suppliers
Ligand	Company
Imatinib	Biovision
Nilotinib	Selleckchem
Ponatinib	Selleckchem
Rebastinib	Selleckchem
Bafetinib	Selleckchem
PD180970	Sigma-Aldrich
Axitinib	Selleckchem
Dasatinib	Selleckchem
PD166326	Cayman
Staurosporine	MCE MedChemExpress
Danusertib	Selleckchem
Tozasertib	Selleckchem
Bosutininb	Selleckchem
AMP-PNP	Sigma-Aldrich
